# Supplementary material
Source: Springer Nature journal article supplement (https://www.springerprofessional.de/resource/supplementary/13173_2013_3_MOESM7_ESM.pdf/11897022)
Supplement: MOESM7 [file 11897022]

Experiment: Block; Size: 100x100

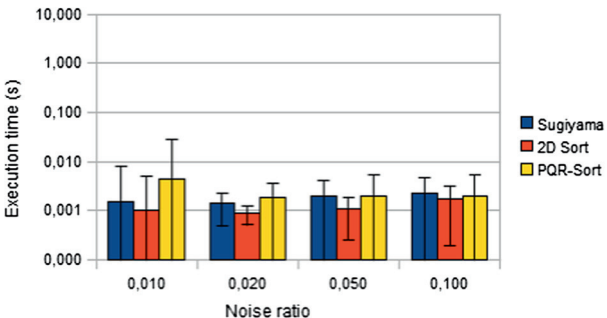**a**

Experiment: Block; Size: 1000x1000

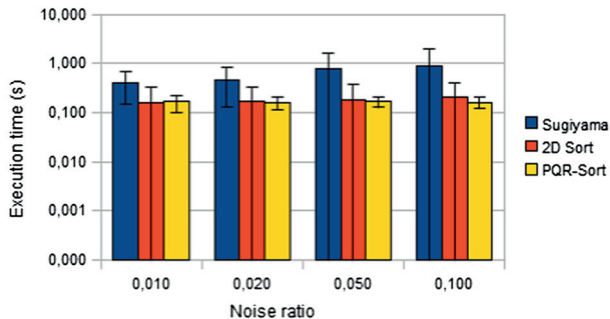**b**

Experiment: Rectnoise; Size: 100x100

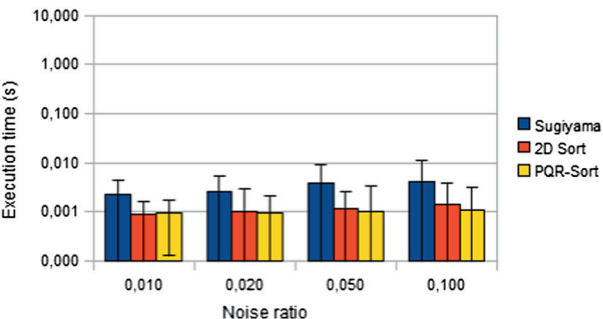**c**

Experiment: Rectnoise; Size: 1000x1000

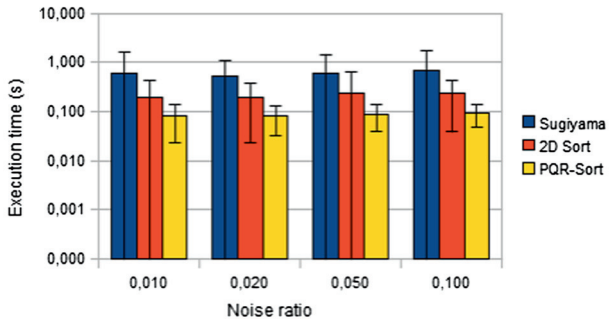**d**
